# Supplementary material for: Speech perception at birth: The brain encodes fast and slow temporal information
Source: PubMed Central journal article supplement — Sci Adv. 2020 Jul 22;6(30):eaba7830. doi: 10.1126/sciadv.aba7830 (PMC7439442; doi:10.1126/sciadv.aba7830), 2020-07-22
Supplement: aba7830_SM.pdf [file aba7830_SM.pdf]

## Supplementary Materials for

### **Speech perception at birth: The brain encodes fast and slow temporal information**

Laurianne Cabrera\* and Judit Gervain

\*Corresponding author. Email: [laurianne.cabrera@parisdescartes.fr](mailto:laurianne.cabrera@parisdescartes.fr)

Published 22 July 2020, *Sci. Adv.* **6**, eaba7830 (2020)  
DOI: [10.1126/sciadv.aba7830](https://doi.org/10.1126/sciadv.aba7830)

#### **This PDF file includes:**

Figs. S1 and S2

Supplementary information: Figure S1 and S2

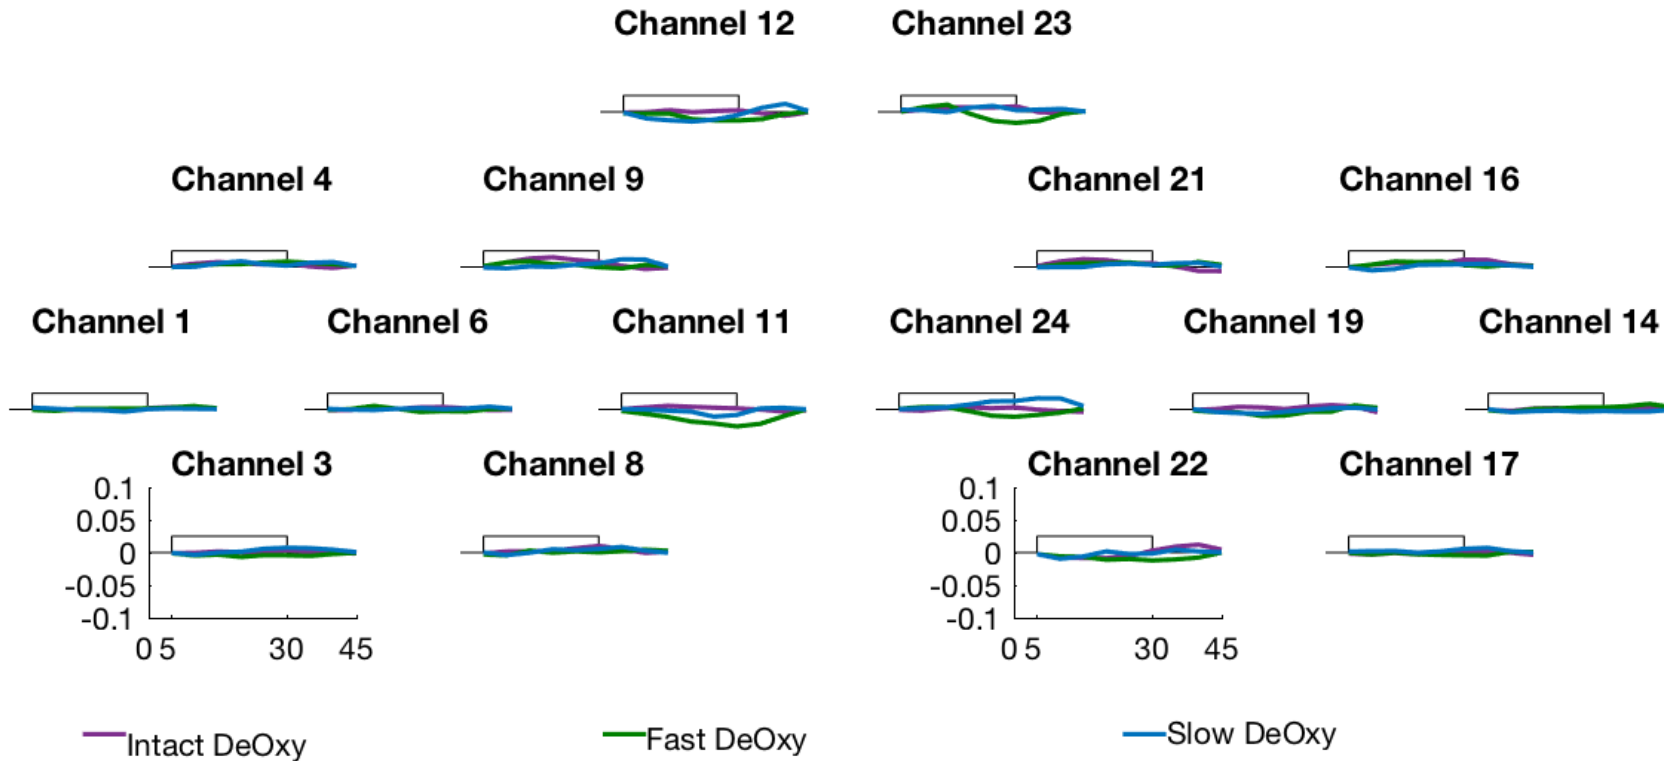

**Fig. S1.** Deoxygenated hemoglobin concentration changes over stimulation blocks in each channel and in each hemisphere. The x-axis represents time in seconds and the y-axis concentration in mmol-mm. The rectangle along the x-axis indicates time of stimulation. The purple lines represent the concentration for the Intact condition, the green for the Fast and the blue for the Slow condition. Changes in concentration did not differ from baseline in any channel for any condition ( $p > .05$ ).

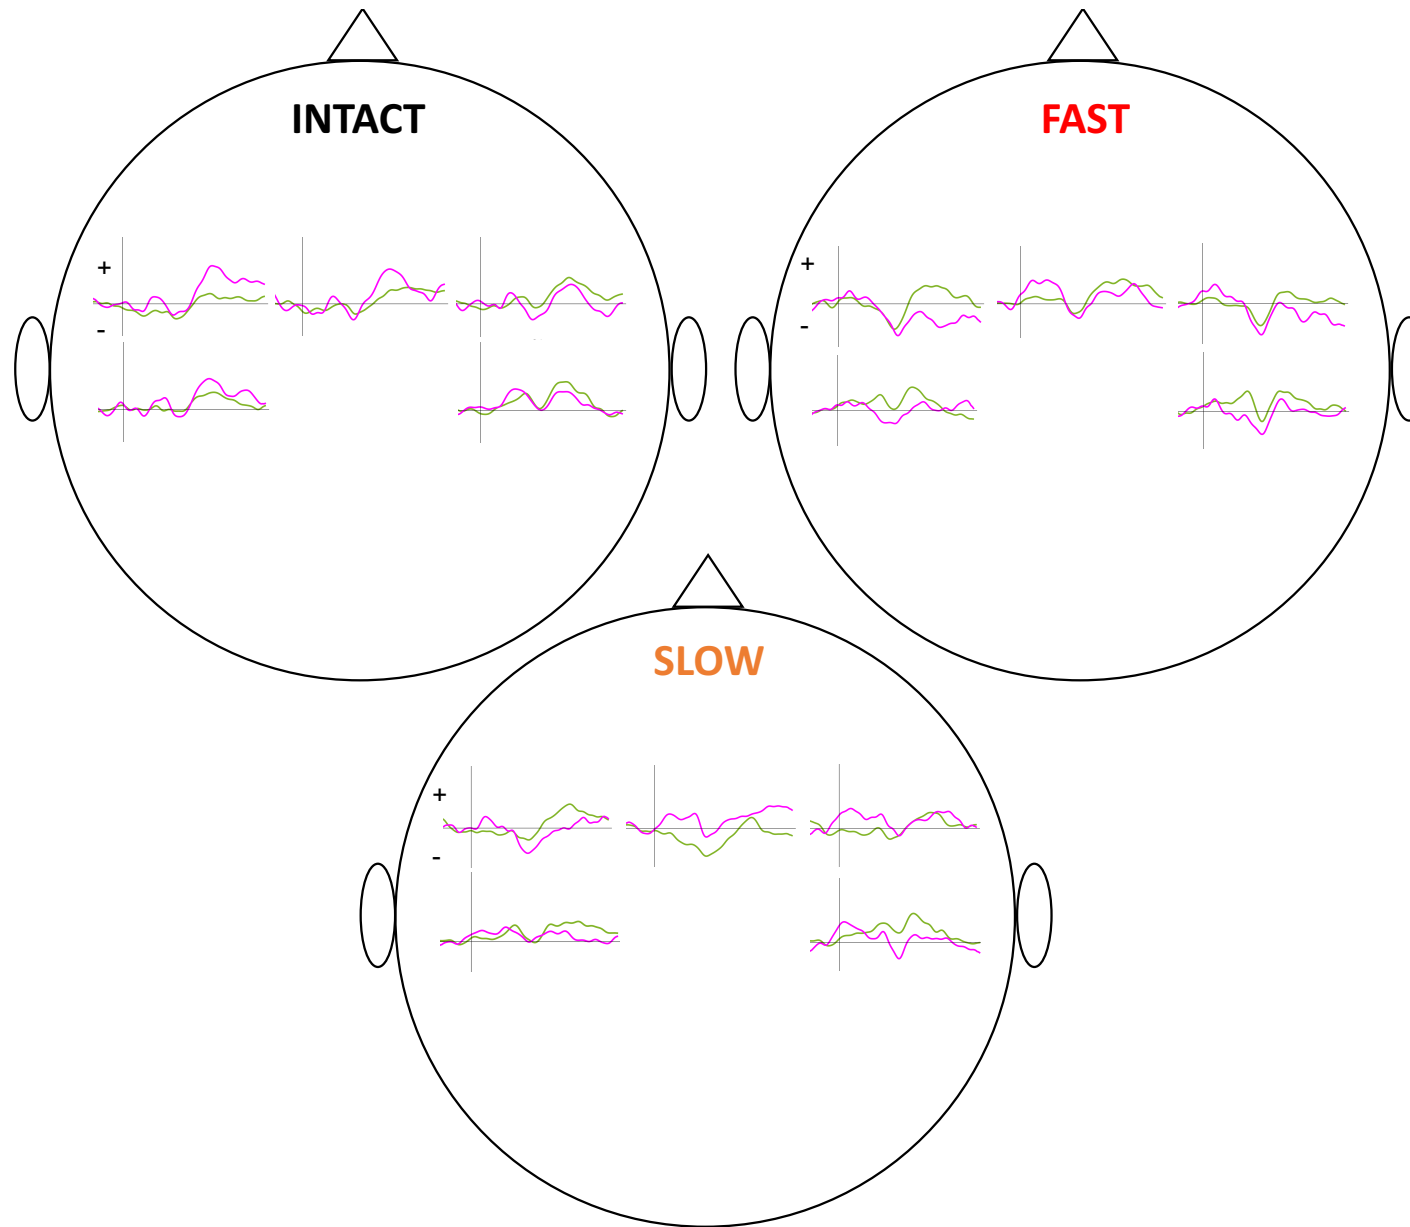

**Fig. S2.** Grand average of amplitude variations (on the y-axis in  $\mu\text{V}$ ) of EEG responses over time (on the x-axis from  $-200$  to  $+800$  ms) recorded at F3, Fz, F4 (from left to right upper row, respectively), C3 and C4 (from left to right lower row, respectively) for the Standard (green lines) and the Deviant (magenta lines) in each condition for the group of newborns.
